# Supplementary material for: Visual signals in the wing display of a tephritid fly deter jumping spider attacks
Source: Oxford University Press journal article supplement (doi:10.1242/jeb.244223), 2022-12-08
Supplement: jeb244223supp.pdf [file jeb244223supp.pdf]

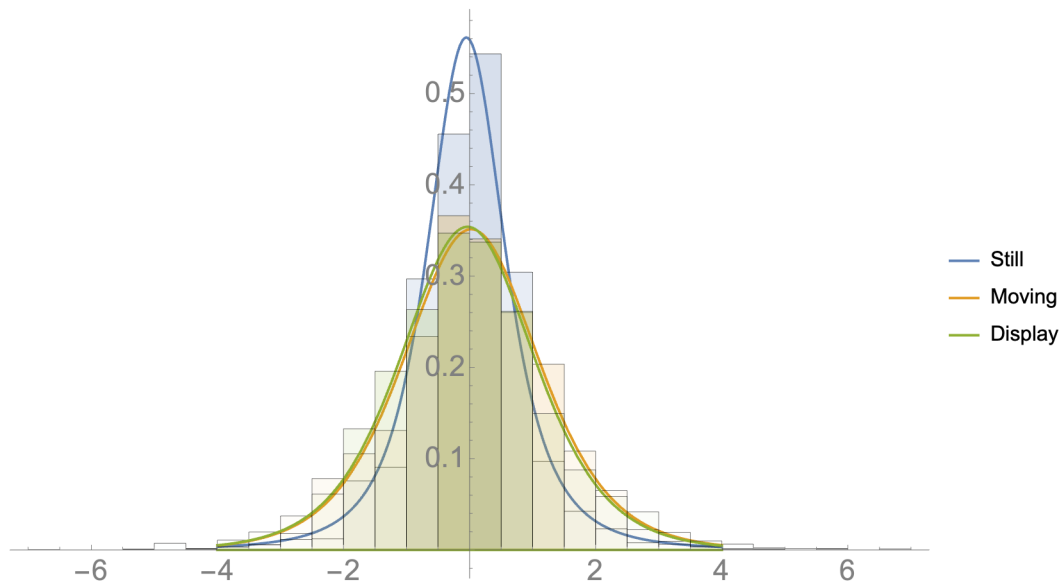

**Fig. S1.** Results of a Kolomogorov Smirnov test looking at the distribution of the distance between the spider retinal midpoint and the stimulus (head of the fly) in the y axis (vertical displacement). All distributions were significantly different from one another (Kolmogorov Smirnov test: Display vs Moving,  $D = 0.037$ ,  $p < 0.006$ ; Display vs Still,  $D = 0.11$ ,  $p < 0.0001$ ; Moving vs Still,  $D = 0.123$ ,  $p < 0.0001$ ). In comparison with the horizontal axis, there was very little vertical displacement. These results suggest that in the vertical axis, spiders were more likely to coincide with the position of the fly in the still treatment, whereas there were similar levels of frequency in the displaying and the moving treatments.

## Supplementary Materials and Methods

### Generalized Linear Models

#### ModelInfo

| Info          | Value    | Comment                             |
|---------------|----------|-------------------------------------|
| Model Type    | Logistic | Model for binary y                  |
| Link function | logit    | log odd of attack=1                 |
| Distribution  | Binomial | Dichotomous event distribution of y |
| R-squared     | 0.120    | Proportion of reduction of error    |
| AIC           | 67.257   | Less is better                      |
| Deviance      | 59.257   | Less is better                      |
| Residual DF   | 47       |                                     |
| Converged     | yes      | A solution was found                |

#### Analysis of Deviance: Omnibus Tests

|           | $\chi^2$ | df | p     |
|-----------|----------|----|-------|
| treatment | 8.09     | 3  | 0.044 |

#### Model Coefficients (Parameter Estimates)

|             | Contrast                                   | Estimate | SE    | 95% Confidence Interval |        | exp(B) | z      | p     |
|-------------|--------------------------------------------|----------|-------|-------------------------|--------|--------|--------|-------|
|             |                                            |          |       | Lower                   | Upper  |        |        |       |
| (Intercept) | Intercept                                  | -0.602   | 0.326 | -1.282                  | 0.0177 | 0.548  | -1.847 | 0.065 |
| treatment1  | Shine - ( Control, Shine, WIC, WICnoUV )   | 0.314    | 0.502 | -0.686                  | 1.3106 | 1.369  | 0.626  | 0.531 |
| treatment2  | WIC - ( Control, Shine, WIC, WICnoUV )     | -0.602   | 0.568 | -1.832                  | 0.4617 | 0.548  | -1.059 | 0.289 |
| treatment3  | WICnoUV - ( Control, Shine, WIC, WICnoUV ) | -1.007   | 0.637 | -2.486                  | 0.1303 | 0.365  | -1.581 | 0.114 |

### PostHocTests

#### Post HbcComparisons-treatment

| Comparison |           | Difference | SE   | z     | p     |
|------------|-----------|------------|------|-------|-------|
| treatment  | treatment |            |      |       |       |
| Control    | - Shine   | 2.67       | 2.18 | 1.201 | 0.230 |
|            | - WIC     | 6.67       | 5.99 | 2.110 | 0.035 |
|            | - WICnoUV | 10.00      | 9.87 | 2.332 | 0.020 |
| Shine      | - WIC     | 2.50       | 2.13 | 1.076 | 0.282 |
|            | - WICnoUV | 3.75       | 3.54 | 1.400 | 0.162 |
| WIC        | - WICnoUV | 1.50       | 1.52 | 0.399 | 0.690 |

## Estimated Marginal Means

| treatment |       |       |                         |       |
|-----------|-------|-------|-------------------------|-------|
| treatment | Prob  | SE    | 95% Confidence Interval |       |
|           |       |       | Lower                   | Upper |
| Control   | 0.667 | 0.136 | 0.3759                  | 0.869 |
| Shine     | 0.429 | 0.132 | 0.2065                  | 0.684 |
| WIC       | 0.231 | 0.117 | 0.0763                  | 0.522 |
| WICnoUV   | 0.167 | 0.108 | 0.0420                  | 0.477 |

## Effects Plots

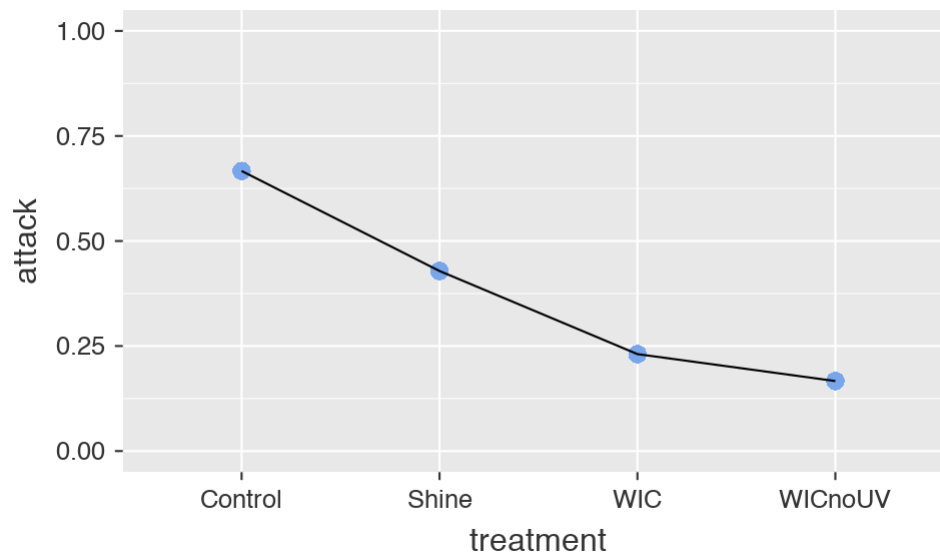

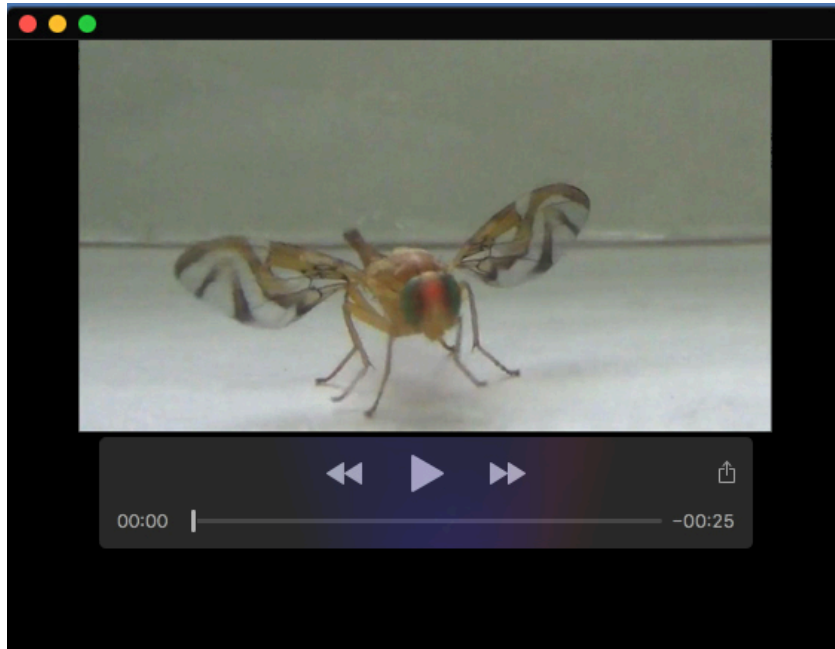

**Movie 1.** Video showing supination display of the Mexican fruit fly (*Anastrepha ludens*) against a jumping spider predator (*Phidippus audax*).

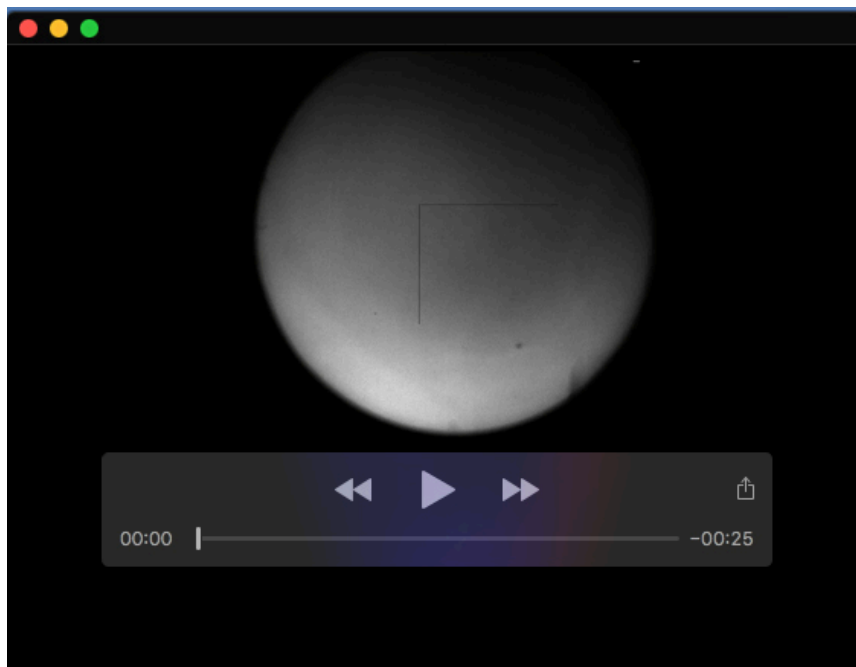

**Movie 2.** Sample video showing the response of the spider retinae overlaid with that of a displaying fly.

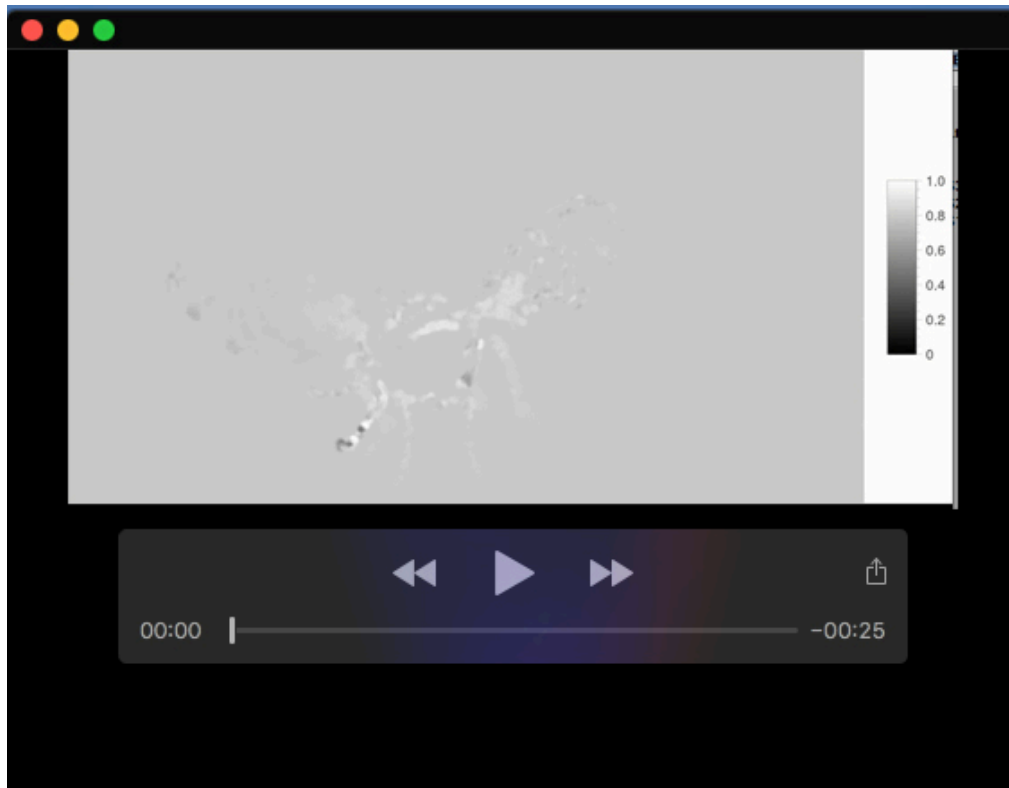

**Movie 3.** Video showing pixel displacement of a displaying fly and a moving fly. The videos are colour coded according to magnitude of displacement, with lighter pixels showing higher displacement and darker pixels showing lower displacement. See Fig. 4 for a vector field representation of these videos.
